# Supplementary material for: Confined crystallization of a HKUST-1 metal–organic framework within mesostructured silica with enhanced structural resistance towards water
Source: Royal Society of Chemistry journal article supplement (doi:10.1039/c7ta04959e), 2017-01-01
Supplement: c7ta04959e1.pdf [file c7ta04959e1.pdf]

## Supporting Information

### Confined Crystallization of HKUST-1 Metal-Organic Framework within Mesostructured Silica for Enhanced Structural Resistance Toward Water

Matjaž Mazaj,<sup>1</sup> Tomaž Čendak,<sup>1</sup> Gianpiero Buscarino,<sup>2</sup> Michela Todaro,<sup>2,3</sup> Nataša Zabukovec Logar<sup>1,4</sup>

<sup>1</sup>National Institute of Chemistry, Hajdrihova 19, 1000 Ljubljana, Slovenia

<sup>2</sup>Dipartimento di Fisica e Chimica, Università di Palermo, 90123 Palermo, Italy

<sup>3</sup>Dipartimento di Fisica e Astronomia, Università di Catania, 95123 Catania, Italy

<sup>4</sup>University of Nova Gorica, Vipavska 13, 5000 Nova Gorica, Slovenia

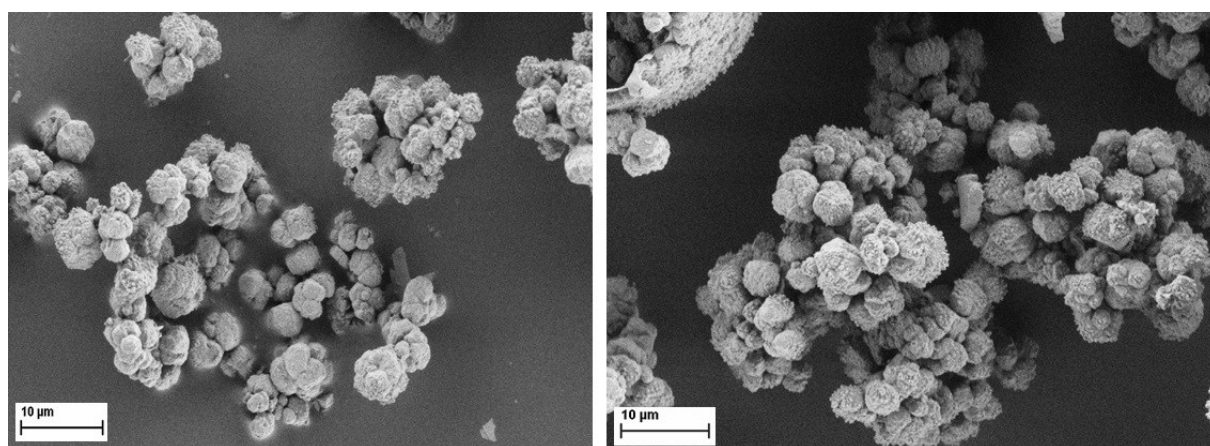

**Figure S1:** Typical SEM micrographs of NH<sub>2</sub>-FDU-12 matrix (left) and FDU-12/HKUST-1 composite (right). Crystallization of HKUST-1 within FDU-12 does not cause any significant morphological changes on the matrix and there are no individual crystals of HKUST-1 visible as a separate phase.

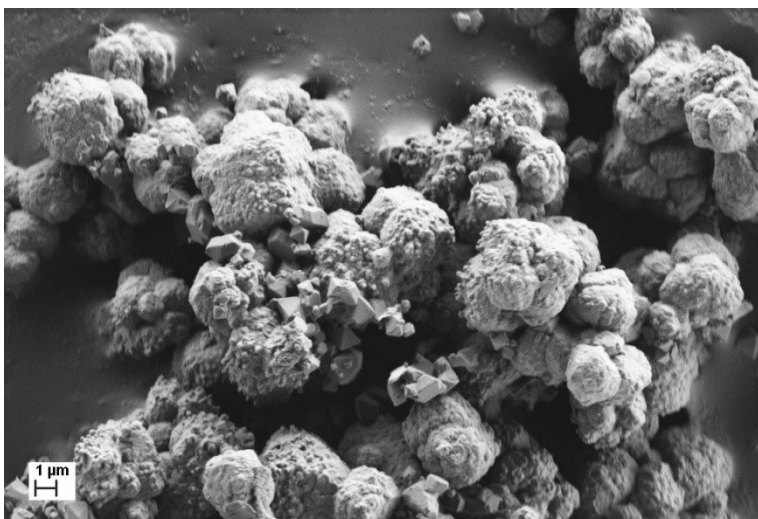

**Figure S2:** SEM micrograph of HKUST1-FDU12 with separate octahedral crystals of HKUST-1 with the size of approximately 1  $\mu\text{m}$  crystallizing after the grafting with the 0.1 M  $\text{Cu}^{2+}$  solution.

#### Calculations of HKUST-1 occupancy within $\text{NH}_2$ -FDU-12 matrix

The occupancy of the mesopores with HKUST-1 material can be expressed as

$$\frac{W_1}{W_2},$$

where  $W_1$  represents measured contribution of HKUST-1 within the FDU-12 matrix, whereas  $W_2$  defines the theoretical content of HKUST-1 at fully occupied FDU-12 mesopores with MOF material.  $W_1$  is further determined by

$$\frac{W_{\text{Cu} - \text{exp}}}{W_{\text{Cu} - \text{HKUST1}}},$$

where  $W_{\text{Cu} - \text{exp}}$  represents Cu weight content in the composite determined by EDS analysis and  $W_{\text{Cu} - \text{HKUST1}}$  theoretical Cu weight content within the bulk HKUST-1, considering the chemical formula  $\text{Cu}_3(\text{BTC})_2 \cdot 3\text{H}_2\text{O}$ . On the other hand  $W_2$  is defined by the expression

$$\frac{\rho_{HKUST1} \cdot V_{mes}}{1 + \rho_{HKUST1} \cdot V_{mes}}$$

$\rho_{HKUST1}$  is calculated crystal density of the bulk HKUST-1 (1.367 g/cm<sup>3</sup>) whereas  $V_{me}$  represents the mesopore volume of NH<sub>2</sub>-FDU-12 matrix determined from N<sub>2</sub> sorption isotherm analysis using BJH method (described later in the manuscript). Considering the above explained expressions, the occupancy of the mesopores with HKUST-1 material can be calculated using formula

$$\frac{W_{Cu-exp} \cdot Mr_{HKUST1} \cdot (1 + \rho_{HKUST1} \cdot V_{mes})}{3Mr_{Cu} \cdot \rho_{HKUST1} \cdot V_{mes}}$$

If we assume that all HKUST-1 crystallizes within the mesopores, the occupancy of the mesopores with MOF phase would be 53 % or with other words the composite contains 19 wt.% of HKUST-1 phase occupying approximately 1/2 of the total available mesopores.

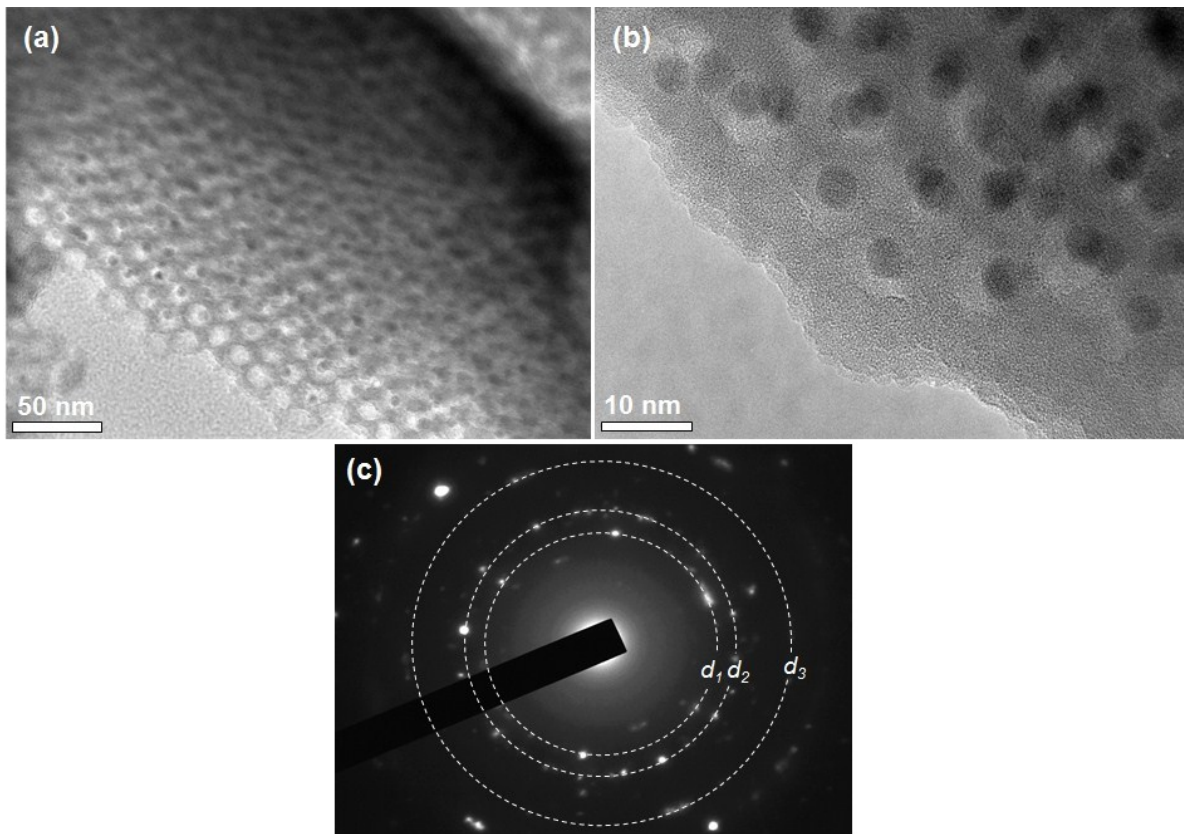

**Figure S3:** HRTEM micrographs of HKUST1-FDU12 at lower magnification (a) and higher magnifications (b). (c) Selected area electron diffraction (SAED) of the corresponding region shown in (a).

**Table S1: Comparison of measured and referenced d values of corresponding crystal planes extracted from SAED analysis.**

|                        | $d_1$ | $d_2$ | $d_3$ |
|------------------------|-------|-------|-------|
| crystallographic plane | [110] | [002] | [202] |
| measured [nm]          | 2.79  | 2.56  | 1.60  |
| PDF (#01-080-1917)     | 2.75  | 2.52  | 1.58  |

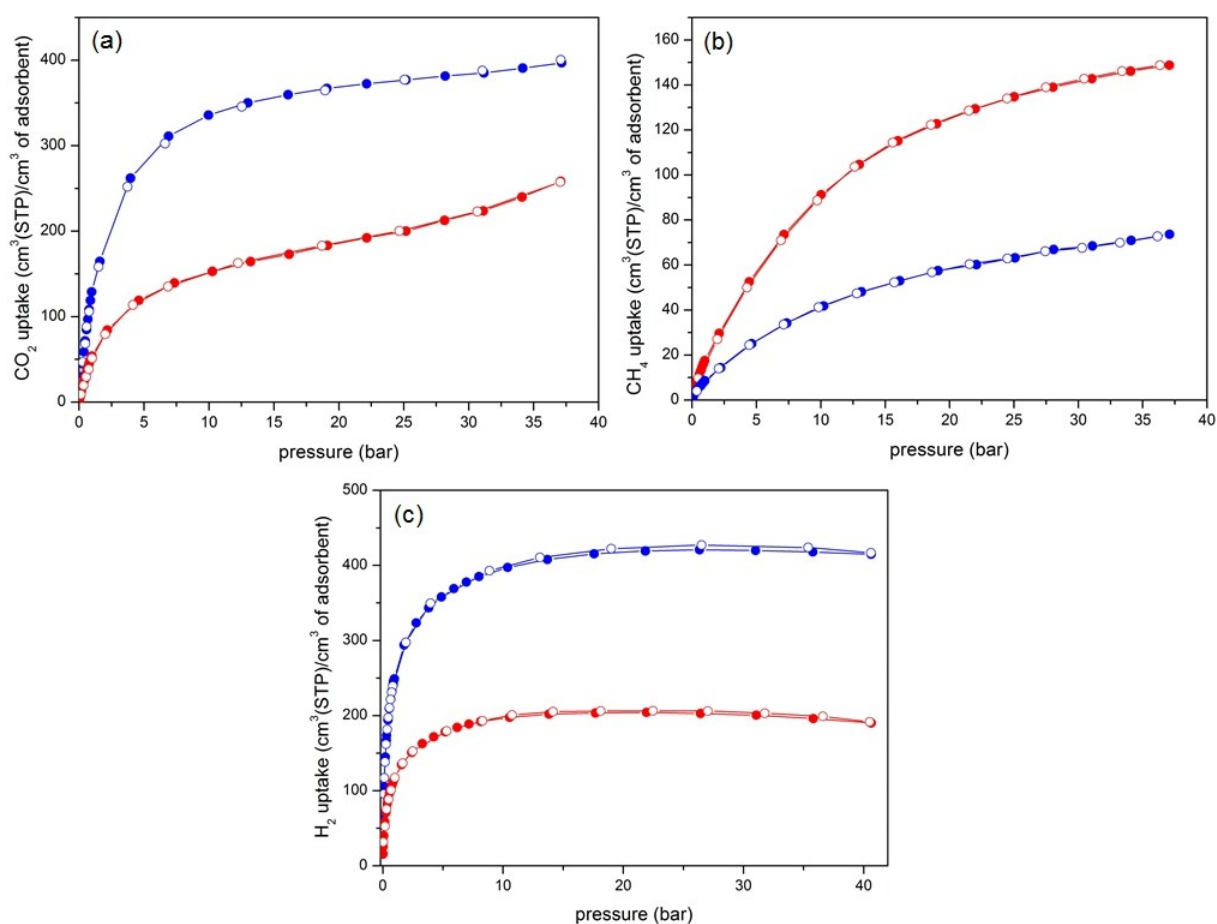

**Figure S4:** Gas sorption isotherms of bulk HKUST-1 (blue) and HKUST1-FDU12 composite (red) for (a) CO<sub>2</sub> measured at 25 °C, (b) CH<sub>4</sub> and (c) H<sub>2</sub> measured at -196 °C, respectively. Full circles - adsorption points, empty circles – desorption points.

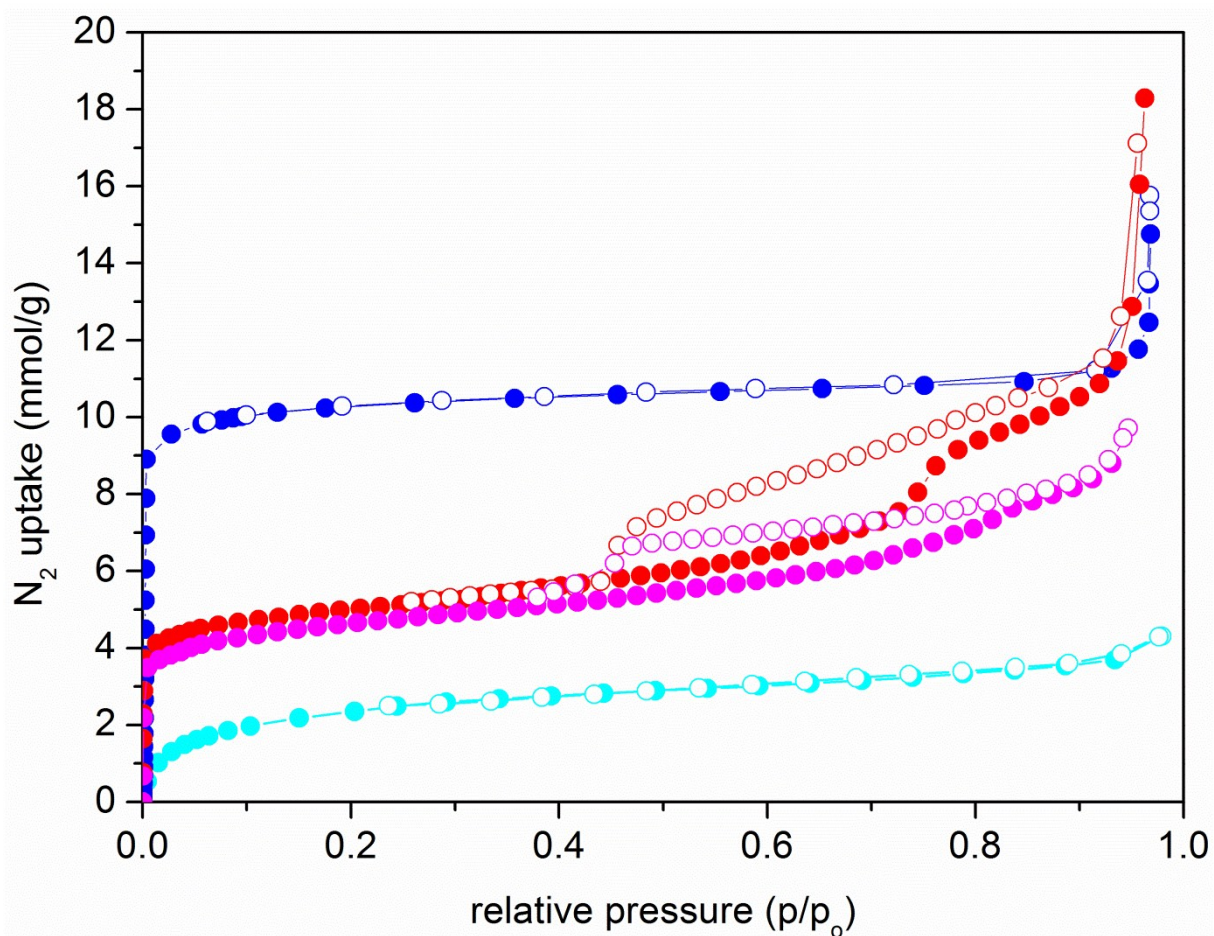

**Figure S5:** The comparison of  $N_2$  sorption isotherms of HKUST-1 and HKUST1-FDU12 before and after stirring in water at  $25^\circ\text{C}$  overnight. Dark blue – bulk HKUST-1 before water treatment, light blue - bulk HKUST-1 after water treatment, red - HKUST1-FDU12 before water treatment, pink - HKUST1-FDU12 after water treatment. Full circles - adsorption points, empty circles – desorption points.

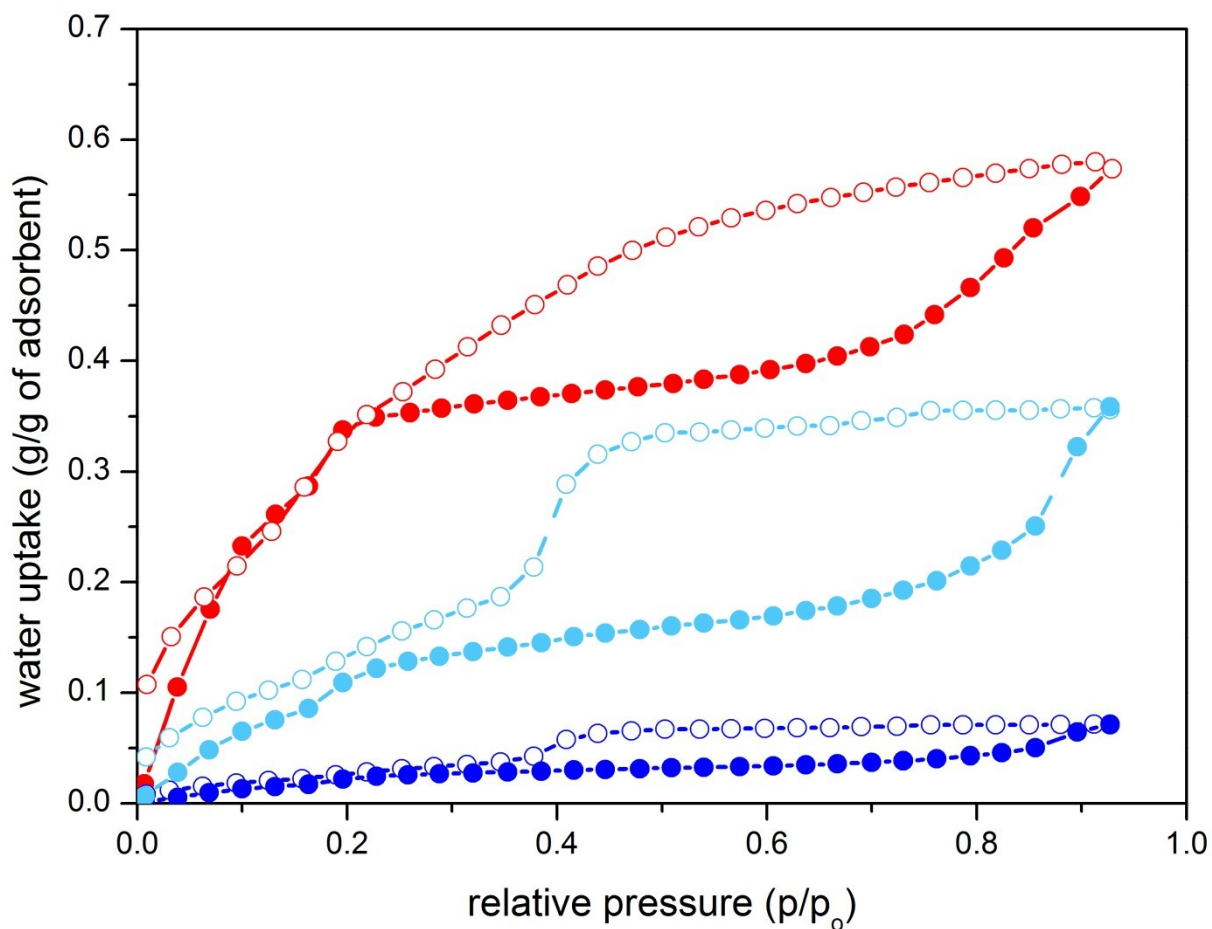

**Figure S6:** Water isotherms of bulk HKUST-1 (red) and HKUST1-FDU12 composite (blue) measured at 25 °C. Light blue circles connected with dashed lines represent the water isotherm with the normalized uptakes to MOF content within the composite. Full circles - adsorption points, empty circles – desorption points.
